# Supplementary material for: Spatial arrangement of several flagellins within bacterial flagella improves motility in different environments
Source: PubMed Central journal article supplement (PMC6299084; doi:10.1038/s41467-018-07802-w), 2018-12-18
Supplement: 41467_2018_7802_MOESM3_ESM.pdf [file 41467_2018_7802_MOESM3_ESM.pdf]

## Description of Additional Supplementary Files

File Name: Supplementary Movie 1

Description: Corresponding movie to Fig. 3 panels i and j of the main manuscript. The movie shows stereotypical cell tracks for wild-type cells in medium with increased viscosity (left) and regular medium (right). Swimming speed is encoded by color according to the color bar on the right.

File Name: Supplementary Movie 2

Description: Movie extracted from the numerical simulation. FlaA-only (left) and FlaBonly flagellar filaments (right) rotate clockwise with a motor torque of  $6.5 \text{ pN}\mu\text{m}$  (see also Fig. 4 of the main manuscript). The only differences between the two simulations are the helix parameters that were experimentally measured (Supplementary Table 6). The simulation is visualized using OVITO.
